# Supplementary material
Source: PubMed Central journal article supplement (PMC6129200)
Supplement: NIHMS937702-supplement.pdf [file NIHMS937702-supplement.pdf]

**Supplementary Table 1:** Baseline characteristics of the population stratified by familial risk assessment status <sup>a,b</sup>

|                                     | <b>Total population<br/>(N= 6192)</b> | <b>Weak FH<br/>(N= 1240)</b> | <b>Moderate FH<br/>(N= 979)</b> | <b>Strong FH<br/>(N= 1240)</b> | <b>p-value <sup>c</sup></b> |
|-------------------------------------|---------------------------------------|------------------------------|---------------------------------|--------------------------------|-----------------------------|
| Age, years                          | 62 (10)                               | 62 (10)                      | 62 (10)                         | 62 (10)                        | .87                         |
| Males (%)                           | 2950 (48)                             | 1979 (50)                    | 457 (47)                        | 514 (41)                       | <.001 <sup>d</sup>          |
| Race/Ethnicity (%)                  |                                       |                              |                                 |                                | <.001 <sup>d</sup>          |
| White                               | 2499 (40)                             | 1370 (35)                    | 521 (53)                        | 558 (45)                       |                             |
| Chinese-American                    | 727 (12)                              | 629 (16)                     | 55 (6)                          | 43 (4)                         |                             |
| African American                    | 1669 (27)                             | 1087 (27)                    | 219 (22)                        | 363 (29)                       |                             |
| Hispanic                            | 1347 (22)                             | 887 (22)                     | 184 (19)                        | 276 (22)                       |                             |
| BMI, kg/m <sup>2</sup>              | 28.3 (5.4)                            | 28.0 (5.3)                   | 28.4 (5.4)                      | 29.3 (5.7)                     | <.001 <sup>d</sup>          |
| LDL, mg/dL                          | 117 (31)                              | 116 (31)                     | 120 (31)                        | 118 (31)                       | .004 <sup>d</sup>           |
| HDL, mg/dL                          | 51 (15)                               | 51 (15)                      | 51 (15)                         | 51 (15)                        | .29                         |
| Lipid-lowering medication use (%)   | 1006 (16)                             | 583 (15)                     | 178 (18)                        | 245 (20)                       | <.001 <sup>d</sup>          |
| SBP, mmHg                           | 126 (21)                              | 126 (21)                     | 126 (21)                        | 127 (20)                       | .34                         |
| Antihypertensive medication use (%) | 2275 (37)                             | 1391 (35)                    | 377 (39)                        | 507 (41)                       | <.001 <sup>d</sup>          |
| Diabetes mellitus (%)               | 740 (12)                              | 476 (12)                     | 91 (9)                          | 173 (14)                       | .003 <sup>d</sup>           |
| Cigarette smoking (%)               |                                       |                              |                                 |                                | .001 <sup>d</sup>           |
| Never                               | 3121 (51)                             | 2072 (52)                    | 474 (49)                        | 575 (46)                       |                             |
| Former                              | 2280 (37)                             | 1409 (36)                    | 388 (40)                        | 483 (39)                       |                             |
| Current                             | 774 (13)                              | 479 (12)                     | 115 (12)                        | 180 (15)                       |                             |

<sup>a</sup> BMI = body mass index, FH = family history, HDL = high density lipoprotein cholesterol, LDL= low density lipoprotein cholesterol, SBP = systolic blood pressure.

<sup>b</sup> Baseline characteristics expressed as means (standard deviation) for continuous variables and numbers, percentages for categorical variables. P-value for difference calculated using ANOVA test for continuous variables and chi-square test for categorical variables.

<sup>c</sup> P-value comparing presence of moderate and strong FRA to weak (i.e. no FH).

<sup>d</sup> Indicated statistically significant results.

**Supplementary Table 2:** Incidence rates (95% confidence interval) of cardiovascular events for each family history definition <sup>a,b</sup>

|                                 | N (%)     | CHD |                       | Angina |                       | Stroke |                      | PAD |                      | CHF |                      | Composite ASCVD <sup>b</sup> |                        |
|---------------------------------|-----------|-----|-----------------------|--------|-----------------------|--------|----------------------|-----|----------------------|-----|----------------------|------------------------------|------------------------|
|                                 |           | N   | IR                    | N      | IR                    | N      | IR                   | N   | IR                   | N   | IR                   | N                            | IR                     |
| <b>Total Population</b>         |           | 250 | 4.17<br>(3.69-4.72)   | 258    | 4.36<br>(3.86-4.92)   | 150    | 2.50<br>(2.13-2.93)  | 75  | 1.24<br>(0.99-1.56)  | 206 | 3.44<br>(3.00-3.94)  | 741                          | 12.92<br>(12.03-13.89) |
| <b>Family History Status</b>    |           |     |                       |        |                       |        |                      |     |                      |     |                      |                              |                        |
| <i>Any Family History</i>       |           |     |                       |        |                       |        |                      |     |                      |     |                      |                              |                        |
| <b>Any</b>                      | 2211 (36) | 108 | 5.06<br>(4.19-6.10)   | 125    | 5.95<br>(5.00-7.09)   | 62     | 2.89<br>(2.25-3.71)  | 27  | 1.25<br>(0.86-1.82)  | 80  | 3.75<br>(3.01-4.66)  | 317                          | 15.69<br>(12.03-13.89) |
| <b>Sibling</b>                  | 840 (14)  | 47  | 5.88<br>(4.42-7.83)   | 48     | 6.09<br>(4.59-8.08)   | 29     | 3.61<br>(2.51-5.19)  | 13  | 1.60<br>(0.93-2.76)  | 33  | 4.11<br>(2.92-5.78)  | 134                          | 17.81<br>(15.04-21.10) |
| <b>Child</b>                    | 62 (1)    | 6   | 11.17<br>(5.02-24.86) | 7      | 13.52<br>(6.45-28.36) | 2      | 3.61<br>(0.90-14.45) | 2   | 3.59<br>(0.90-14.37) | 4   | 7.45<br>(2.80-19.84) | 15                           | 30.77<br>(18.55-51.05) |
| <b>Parent</b>                   | 1686 (27) | 77  | 4.69<br>(3.75-5.87)   | 100    | 6.20<br>(5.10-7.54)   | 42     | 2.55<br>(1.88-3.45)  | 21  | 1.27<br>(0.83-1.94)  | 59  | 3.60<br>(2.79-4.64)  | 235                          | 15.12<br>(13.30-17.18) |
| <b>Spouse</b>                   | 338 (5)   | 19  | 6.01<br>(3.84-9.42)   | 15     | 4.77<br>(2.87-7.90)   | 14     | 4.40<br>(2.60-7.42)  | 6   | 1.87<br>(0.84-4.17)  | 13  | 4.07<br>(2.37-7.01)  | 50                           | 16.54<br>(12.54-21.82) |
| <i>Premature Family History</i> |           |     |                       |        |                       |        |                      |     |                      |     |                      |                              |                        |
| <b>Premature</b>                | 983 (16)  | 48  | 5.06<br>(3.81-6.71)   | 57     | 6.13<br>(4.72-7.94)   | 25     | 2.62<br>(1.77-3.88)  | 17  | 1.78<br>(1.11-2.86)  | 37  | 3.91<br>(2.83-5.40)  | 142                          | 15.83<br>(13.43-18.66) |
| <b>Sibling</b>                  | 463 (7)   | 24  | 5.44<br>(3.65-8.12)   | 27     | 6.22<br>(4.26-9.06)   | 9      | 2.02<br>(1.05-3.89)  | 8   | 1.80<br>(0.90-3.59)  | 21  | 4.78<br>(3.12-7.34)  | 69                           | 16.57<br>(13.08-20.98) |
| <b>Child</b>                    | 57 (1)    | 6   | 12.29<br>(5.52-27.36) | 7      | 14.94<br>(7.12-31.34) | 2      | 3.97<br>(0.99-15.86) | 2   | 3.94<br>(0.99-15.77) | 4   | 8.20<br>(3.08-21.84) | 15                           | 34.22<br>(20.63-56.77) |
| <b>Parent</b>                   | 554 (9)   | 25  | 4.59<br>(3.10-6.79)   | 32     | 5.99<br>(4.24-8.47)   | 15     | 2.75<br>(1.66-4.56)  | 10  | 1.83<br>(0.98-3.39)  | 19  | 3.49<br>(2.23-5.47)  | 79                           | 15.36<br>(12.32-19.15) |
| <b>Spouse</b>                   | 226 (4)   | 11  | 5.11<br>(3.69-4.72)   | 10     | 4.67<br>(2.51-8.67)   | 9      | 4.15<br>(2.16-7.97)  | 2   | 0.91<br>(0.23-3.65)  | 7   | 3.22<br>(1.54-6.76)  | 30                           | 14.48<br>(10.13-20.71) |

| Familial Risk      |           |     |                         |     |                         |    |                         |    |                         |     |                         |     |                            |
|--------------------|-----------|-----|-------------------------|-----|-------------------------|----|-------------------------|----|-------------------------|-----|-------------------------|-----|----------------------------|
| <b>FH Strong</b>   | 1240 (20) | 61  | 5.10<br>(3.97-<br>6.56) | 77  | 6.57<br>(5.26-<br>8.22) | 37 | 3.08<br>(2.23-<br>4.26) | 19 | 1.57<br>(1.00-<br>2.47) | 47  | 3.94<br>(2.96-<br>5.24) | 187 | 16.59<br>(14.38-<br>19.15) |
| <b>FH Moderate</b> | 1435 (23) | 67  | 5.07<br>(3.82-<br>6.73) | 75  | 5.13<br>(3.87-<br>6.81) | 40 | 2.63<br>(1.78-<br>3.89) | 17 | 0.83<br>(0.42-<br>1.67) | 49  | 3.48<br>(2.47-<br>4.90) | 197 | 14.55<br>(12.26-<br>17.27) |
| <b>FH Weak</b>     | 3981 (64) | 142 | 3.67<br>(3.11-<br>4.33) | 133 | 3.50<br>(2.95-<br>4.14) | 88 | 2.29<br>(1.86-<br>2.82) | 48 | 1.25<br>(0.94-<br>1.65) | 126 | 3.28<br>(2.76-<br>3.91) | 424 | 11.44<br>(10.40-<br>12.58) |

<sup>a</sup> ASCVD – atherosclerotic cardiovascular disease, CHD = coronary heart disease, CHF = congestive heart failure, FH = family history, IR = Incidence rates (expressed per 1000 per years), N = number.

<sup>b</sup> Composite ASCVD includes CHD, angina, stroke, PAD, and CHF.

**Supplementary Table 3: Hazard ratios (95% confidence interval) for the association of each FH definition and non-coronary cardiovascular events<sup>a</sup>**

|                                 | Stroke                        |                      |                      | PAD              |                      |                      | CHF              |                      |                      |
|---------------------------------|-------------------------------|----------------------|----------------------|------------------|----------------------|----------------------|------------------|----------------------|----------------------|
|                                 | Unadjusted                    | Model 1 <sup>b</sup> | Model 2 <sup>c</sup> | Unadjusted       | Model 1 <sup>b</sup> | Model 2 <sup>c</sup> | Unadjusted       | Model 1 <sup>b</sup> | Model 2 <sup>c</sup> |
| <b>Family History Status</b>    |                               |                      |                      |                  |                      |                      |                  |                      |                      |
| <b>No FH (ref)</b>              | 1.00                          | 1.00                 | 1.00                 | 1.00             | 1.00                 | 1.00                 | 1.00             | 1.00                 | 1.00                 |
| <i>Any Family History</i>       |                               |                      |                      |                  |                      |                      |                  |                      |                      |
| <b>Any</b>                      | 1.27 (0.92-1.76)              | 1.22 (0.87-1.70)     | 1.19 (0.85-1.67)     | 1.01 (0.63-1.62) | 0.93 (0.58-1.50)     | 0.90 (0.55-1.46)     | 1.15 (0.87-1.52) | 1.14 (0.85-1.52)     | 1.11 (0.83-1.48)     |
| <b>Sibling</b>                  | 1.55 (1.03-2.32) <sup>d</sup> | 1.17 (0.78-1.77)     | 1.20 (0.79-1.81)     | 1.34 (0.74-2.44) | 1.01 (0.55-1.85)     | 0.92 (0.49-1.73)     | 1.23 (0.85-1.79) | 0.95 (0.65-1.39)     | 0.95 (0.65-1.39)     |
| <b>Parent</b>                   | 1.03 (0.72-1.47)              | 1.10 (0.77-1.59)     | 1.06 (0.73-1.53)     | 1.03 (0.62-1.71) | 1.09 (0.65-1.83)     | 1.02 (0.60-1.73)     | 1.06 (0.78-1.44) | 1.21 (0.88-1.65)     | 1.16 (0.85-1.59)     |
| <b>Child</b>                    | 1.46 (0.36-5.87)              | 0.78 (0.19-3.20)     | 0.77 (0.19-3.17)     | 2.87(0.70-11.70) | 1.57 (0.38-6.55)     | 1.59 (0.37-6.78)     | 2.20 (0.82-5.92) | 1.21 (0.44-3.28)     | 1.57 (0.58-4.30)     |
| <b>Spouse</b>                   | 1.84 (1.06-3.19) <sup>d</sup> | 1.36 (0.77-2.40)     | 1.39 (0.79-2.46)     | 1.54 (0.67-3.55) | 1.34 (0.57-3.17)     | 1.45 (0.61-3.43)     | 1.20 (0.68-2.10) | 0.91 (0.51-1.61)     | 0.99 (0.55-1.76)     |
| <i>Premature Family History</i> |                               |                      |                      |                  |                      |                      |                  |                      |                      |
| <b>Premature</b>                | 1.06 (0.69-1.63)              | 1.05 (0.68-1.62)     | 1.03 (0.67-1.60)     | 1.56 (0.91-2.67) | 1.54 (0.89-2.67)     | 1.47 (0.84-2.59)     | 1.17 (0.82-1.67) | 1.24 (0.87-1.78)     | 1.19 (0.83-1.72)     |
| <b>Sibling</b>                  | 0.80 (0.41-1.56)              | 0.74 (0.37-1.45)     | 0.76 (0.38-1.49)     | 1.49 (0.72-3.10) | 1.39 (0.67-2.91)     | 1.24 (0.56-2.72)     | 1.44 (0.91-2.25) | 1.41 (0.89-2.22)     | 1.46 (0.92-2.30)     |
| <b>Parent</b>                   | 1.11 (0.65-1.89)              | 1.28 (0.74-2.19)     | 1.19 (0.69-2.04)     | 1.55 (0.80-3.01) | 1.79 (0.92-3.52)     | 1.79 (0.91-3.53)     | 1.02 (0.63-1.63) | 1.28 (0.79-2.06)     | 1.12 (0.69-1.83)     |
| <b>Child</b>                    | 1.60 (0.40-6.45)              | 0.88 (0.22-3.61)     | 0.87 (0.21-3.58)     | 3.15(0.77,12.83) | 1.72 (0.41-7.20)     | 1.77 (0.41-7.58)     | 2.42 (0.90-6.52) | 1.37 (0.50-3.73)     | 1.87 (0.68-5.14)     |
| <b>Spouse</b>                   | 1.71 (0.87-3.35)              | 1.45 (0.73-2.88)     | 1.42 (0.71-2.81)     | 0.73 (0.18-2.96) | 0.71 (0.17-2.94)     | 0.76 (0.18-3.16)     | 0.94 (0.44-1.99) | 0.86 (0.40-1.84)     | 0.99 (0.55-1.76)     |
| <b>Familial Risk</b>            |                               |                      |                      |                  |                      |                      |                  |                      |                      |
| <b>Weak</b>                     | 1.00 (ref)                    | 1.00 (ref)           | 1.00 (ref)           | 1.00 (ref)       | 1.00 (ref)           | 1.00 (ref)           | 1.00 (ref)       | 1.00 (ref)           | 1.00 (ref)           |
| <b>Moderate</b>                 | 1.15 (0.74-1.80)              | 1.14 (0.73-1.79)     | 1.09 (0.69-1.73)     | 0.67 (0.32-1.42) | 0.62 (0.29-1.32)     | 0.64 (0.30-1.37)     | 1.07 (0.72-1.56) | 1.06 (0.71-1.57)     | 1.06 (0.71-1.58)     |
| <b>Strong</b>                   | 1.35 (0.92-1.98)              | 1.26 (0.86-1.87)     | 1.25 (0.85-1.87)     | 1.27 (0.74-2.15) | 1.16 (0.68-1.99)     | 1.08 (0.62-1.88)     | 1.20 (0.86-1.68) | 1.19 (0.85-1.68)     | 1.13 (0.80-1.59)     |

<sup>a</sup> ASCVD = atherosclerotic cardiovascular disease, CHD = coronary heart disease, CHF = Congestive Heart Failure, FH = family history, PAD = peripheral artery disease.

<sup>b</sup> Model 1: Adjusted for age, sex, race/ethnicity, education, and MESA site.

<sup>c</sup> Model 2: Adjusted for Model 1 covariates + body mass index, diabetes mellitus, cigarette smoking status, systolic blood pressure, LDL-C, HDL-C, lipid-lowering therapy, and anti-hypertensive medication use.

<sup>d</sup> Indicates statistically significant results.

**Supplementary Table 4:** Hazard ratios (95% confidence interval) for the association of the number of relatives with any-FH or premature-FH and composite ASCVD events <sup>a</sup>

| Relatives (n)       | Relatives in each category (n) | Unadjusted                    | Model 1 <sup>b</sup>          | Model 2 <sup>c</sup>          |
|---------------------|--------------------------------|-------------------------------|-------------------------------|-------------------------------|
| <b>Any FH</b>       |                                |                               |                               |                               |
| 0                   | 3981                           | 1 (ref)                       | 1 (ref)                       | 1 (ref)                       |
| 1                   | 1626                           | 1.30 (1.11,1.53) <sup>d</sup> | 1.32 (1.12,1.56) <sup>d</sup> | 1.25 (1.06,1.48) <sup>d</sup> |
| 2-8                 | 593                            | 1.54 (1.24,1.93) <sup>d</sup> | 1.37 (1.09,1.72) <sup>d</sup> | 1.34 (1.07,1.68) <sup>d</sup> |
| <i>P for trend</i>  | –                              | <.001                         | <.001                         | .002                          |
| <b>Premature FH</b> |                                |                               |                               |                               |
| 0                   | 5209                           | 1 (ref)                       | 1 (ref)                       | 1 (ref)                       |
| 1                   | 836                            | 1.20 (0.98,1.47)              | 1.25 (1.02,1.53) <sup>d</sup> | 1.20 (0.98,1.48)              |
| 2-6                 | 155                            | 1.63 (1.11,2.37) <sup>d</sup> | 1.77 (1.21,2.60) <sup>d</sup> | 1.65 (1.13,2.43) <sup>d</sup> |
| <i>P for trend</i>  | –                              | .004                          | .001                          | .003                          |

<sup>a</sup> ASCVD = atherosclerotic cardiovascular disease, FH = family history.

<sup>b</sup> Model 1: Adjusted for age, sex, ethnicity, education, and MESA site.

<sup>c</sup> Model 2: Adjusted for Model 1 covariates + body mass index, diabetes mellitus, cigarette smoking status, systolic blood pressure, LDL-C, HDL-C, lipid-lowering therapy, and anti-hypertensive medication use.

<sup>d</sup> Indicates statistically significant results.

**Supplementary Table 5:** Hazard ratios (95% confidence interval) for the association of parental, sibling, and spousal FH definitions and cardiovascular events <sup>a</sup>

|                                        | CHD                              |                                  |                                  | Angina                           |                                  |                                  | Composite ASCVD                  |                                  |                                  |
|----------------------------------------|----------------------------------|----------------------------------|----------------------------------|----------------------------------|----------------------------------|----------------------------------|----------------------------------|----------------------------------|----------------------------------|
|                                        | Unadjusted                       | Model 1 <sup>b</sup>             | Model 2 <sup>c</sup>             | Unadjusted                       | Model 1 <sup>b</sup>             | Model 2 <sup>c</sup>             | Unadjusted                       | Model 1 <sup>b</sup>             | Model 2 <sup>c</sup>             |
| <b>Family History Status</b>           |                                  |                                  |                                  |                                  |                                  |                                  |                                  |                                  |                                  |
| <b>No FH (ref)</b>                     | 1.00                             | 1.00                             | 1.00                             | 1.00                             | 1.00                             | 1.00                             | 1.00                             | 1.00                             | 1.00                             |
| <b>Any Family History Status</b>       |                                  |                                  |                                  |                                  |                                  |                                  |                                  |                                  |                                  |
| <b>Sibling</b>                         | 1.51<br>(1.10,2.07) <sup>d</sup> | 1.18<br>(0.86,1.63)              | 1.16<br>(0.84,1.61)              | 1.48<br>(1.08,2.02) <sup>d</sup> | 1.31<br>(0.95,1.81)              | 1.25<br>(0.90,1.72)              | 1.46<br>(1.21,1.76) <sup>d</sup> | 1.16<br>(0.96,1.40)              | 1.12<br>(0.93,1.36)              |
| <b>Parent</b>                          | 1.18<br>(0.90,1.54)              | 1.35<br>(1.02,1.78) <sup>d</sup> | 1.35<br>(1.02,1.78) <sup>d</sup> | 1.69<br>(1.32,2.18) <sup>d</sup> | 1.88<br>(1.45,2.43) <sup>d</sup> | 1.70<br>(1.31,2.22) <sup>d</sup> | 1.25<br>(1.07,1.46) <sup>d</sup> | 1.36<br>(1.16,1.60) <sup>d</sup> | 1.30<br>(1.10,1.52) <sup>d</sup> |
| <b>Child</b>                           | 2.75<br>(1.22,6.19) <sup>d</sup> | 1.74<br>(0.77,3.96)              | 1.96<br>(0.86,4.47)              | 3.05<br>(1.44,6.47) <sup>d</sup> | 2.64<br>(1.23,5.67) <sup>d</sup> | 3.31<br>(1.53,7.15) <sup>d</sup> | 2.38<br>(1.43,3.98) <sup>d</sup> | 1.57<br>(0.93,2.63)              | 1.82<br>(1.08,3.06) <sup>d</sup> |
| <b>Spouse</b>                          | 1.48<br>(0.93,2.37)              | 1.30<br>(0.80,2.10)              | 1.25<br>(0.76,2.04)              | 1.09<br>(0.65,1.84)              | 1.11<br>(0.65,1.89)              | 1.14<br>(0.66,1.94)              | 1.30<br>(0.97,1.73)              | 1.12<br>(0.83,1.50)              | 1.13<br>(0.84,1.52)              |
| <b>Premature Family History Status</b> |                                  |                                  |                                  |                                  |                                  |                                  |                                  |                                  |                                  |
| <b>Sibling</b>                         | 1.34<br>(0.88,2.04)              | 1.30<br>(0.85,1.98)              | 1.31<br>(0.86,2.01)              | 1.47<br>(0.98,2.18)              | 1.51<br>(1.01,2.26) <sup>d</sup> | 1.50<br>(1.00,2.24) <sup>d</sup> | 1.31<br>(1.02,1.68)              | 1.27<br>(0.98,1.63)              | 1.24<br>(0.96,1.59)              |
| <b>Parent</b>                          | 1.11<br>(0.73,1.68)              | 1.37<br>(0.90,2.08)              | 1.32<br>(0.87,2.00)              | 1.43<br>(0.99,2.08)              | 1.70<br>(1.17,2.47) <sup>d</sup> | 1.53<br>(1.04,2.24) <sup>d</sup> | 1.21<br>(0.96,1.53) <sup>d</sup> | 1.44<br>(1.14,1.83) <sup>d</sup> | 1.34<br>(1.06,1.71) <sup>d</sup> |
| <b>Child</b>                           | 3.04<br>(1.35,6.83) <sup>d</sup> | 1.95<br>(0.86,4.44)              | 2.25<br>(0.98,5.15)              | 3.36<br>(1.59,7.13) <sup>d</sup> | 2.91<br>(1.35,6.26) <sup>d</sup> | 3.70<br>(1.71,8.01) <sup>d</sup> | 2.65<br>(1.59,4.42) <sup>d</sup> | 1.79<br>(1.06,2.99) <sup>d</sup> | 2.10<br>(1.25,3.53) <sup>d</sup> |
| <b>Spouse</b>                          | 1.24<br>(0.68,2.26)              | 1.29<br>(0.70,2.37)              | 1.16<br>(0.61,2.21)              | 1.07<br>(0.57,2.02)              | 1.23<br>(0.65,2.33)              | 1.27<br>(0.67,2.41)              | 1.13<br>(0.78,1.62)              | 1.12<br>(0.78,1.63)              | 1.10<br>(0.76,1.61)              |

<sup>a</sup> ASCVD = atherosclerotic cardiovascular disease, CHD = coronary heart disease, FH = family history.

<sup>b</sup> Model 1: Adjusted for age, sex, ethnicity, education, and MESA site.

<sup>c</sup> Model 2: Adjusted for Model 1 covariates + body mass index, diabetes mellitus, cigarette smoking status, systolic blood pressure, LDL-C, HDL-C, lipid-lowering therapy, and anti-hypertensive medication use.

<sup>d</sup> Indicates statistically significant results.

**Supplementary Table 6:** Net reclassification improvement (95% confidence interval) analysis for incident cardiovascular events with addition of FRS to model adjusted for FH status in the entire study population and those at intermediate risk by the FRS <sup>a</sup>

| FH Variable                            | CHD                              |                             |                            | Composite ASCVD                  |                             |                            |
|----------------------------------------|----------------------------------|-----------------------------|----------------------------|----------------------------------|-----------------------------|----------------------------|
|                                        | Total Population                 |                             |                            |                                  |                             |                            |
|                                        | NRI                              | Reclassified as higher risk | Reclassified as lower risk | NRI (95% CI)                     | Reclassified as higher risk | Reclassified as lower risk |
| <b>FH Any + FRS</b>                    | 0.656 (0.541,0.757) <sup>b</sup> |                             |                            | 0.614 (0.529,0.692) <sup>b</sup> |                             |                            |
| No. of events                          |                                  | 11/250                      | 6/250                      |                                  | 63/738                      | 63/738                     |
| No. with no events                     |                                  | 72/5914                     | 56/5914                    |                                  | 447/5431                    | 341/5431                   |
| <b>FH Premature + FRS</b>              | 0.652 (0.539,0.763) <sup>b</sup> |                             |                            | 0.607 (0.539,0.689) <sup>b</sup> |                             |                            |
| No. of events                          |                                  | 8/250                       | 5/250                      |                                  | 42/738                      | 37/738                     |
| No. with no events                     |                                  | 37/5914                     | 26/5914                    |                                  | 253/5431                    | 226/5431                   |
| <b>FH Risk Strata + FRS</b>            | 0.660 (0.529,0.763) <sup>b</sup> |                             |                            | 0.615 (0.540,0.685) <sup>b</sup> |                             |                            |
| No. of events                          |                                  | 10/250                      | 5/250                      |                                  | 67/738                      | 59/738                     |
| No. with no events                     |                                  | 55/5906                     | 55/5906                    |                                  | 430/5423                    | 318/5423                   |
| Population at Intermediate Risk by FRS |                                  |                             |                            |                                  |                             |                            |
|                                        | NRI (95% CI)                     | Reclassified as higher risk | Reclassified as lower risk | NRI (95% CI)                     | Reclassified as higher risk | Reclassified as lower risk |
| <b>FH Any + FRS</b>                    | 0.437 (0.285,0.649) <sup>b</sup> |                             |                            | 0.361 (0.250,0.462) <sup>b</sup> |                             |                            |
| No. of events                          |                                  | 15/134                      | 12/134                     |                                  | 30/396                      | 28/396                     |
| No. with no events                     |                                  | 179/3062                    | 125/3062                   |                                  | 246/2804                    | 375/2804                   |
| <b>FH Premature + FRS</b>              | 0.468 (0.267,0.639) <sup>b</sup> |                             |                            | 0.339 (0.255,0.466) <sup>b</sup> |                             |                            |
| No. of events                          |                                  | 6/134                       | 4/134                      |                                  | 10/396                      | 7/396                      |
| No. with no events                     |                                  | 75/3062                     | 54/3062                    |                                  | 78/2804                     | 92/2804                    |
| <b>FH Risk Strata + FRS</b>            | 0.435 (0.273,0.643) <sup>b</sup> |                             |                            | 0.359 (0.259,0.462) <sup>b</sup> |                             |                            |
| No. of events                          |                                  | 7/134                       | 7/134                      |                                  | 27/396                      | 23/396                     |
| No. with no events                     |                                  | 132/3059                    | 88/3059                    |                                  | 199/2804                    | 321/2804                   |

<sup>a</sup> ASCVD = atherosclerotic cardiovascular disease, CHD = coronary heart disease, CI = confidence interval, FH = family history, FRS = Framingham risk score, NRI = net reclassification index.

<sup>b</sup> Indicates statistically significant results.
